# Supplementary material for: Sequence variation in Plasmodium falciparum merozoite surface protein-2 is associated with virulence causing severe and cerebral malaria
Source: PubMed Central journal article supplement (PMC5771562; doi:10.1371/journal.pone.0190418), 2018-01-17
Supplement: pone.0190418.s001.pdf [file pone.0190418.s001.pdf]

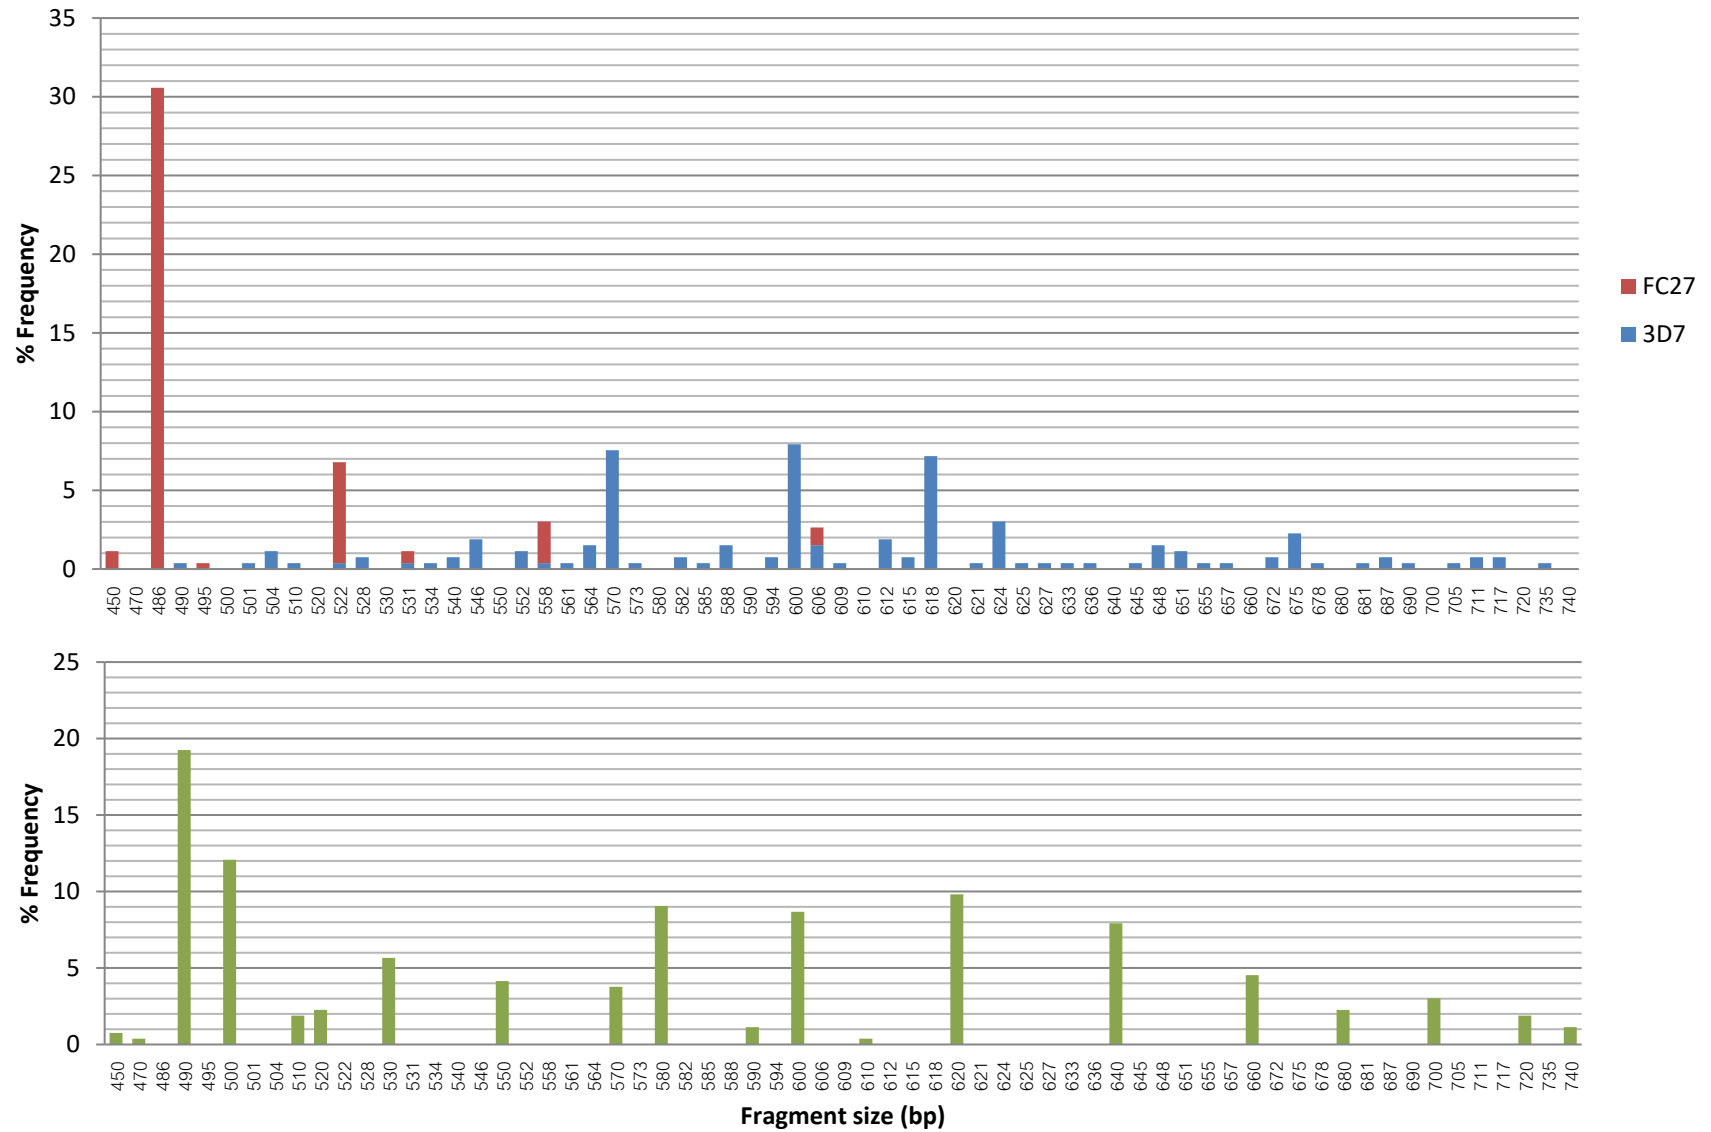

**S1 Fig. Frequencies of different sized *msp2* variants determined by DNA sequencing (upper) and conventional gel electrophoresis (lower).** Sequence analysis differentiated *msp2* variants into FC27 (red bars) or 3D7 (blue bars) families, respectively. The frequencies of variants sized by gel electrophoresis is shown by green bars in the lower panel.
