# Supplementary material for: Sequence variation in Plasmodium falciparum merozoite surface protein-2 is associated with virulence causing severe and cerebral malaria
Source: PubMed Central journal article supplement (PMC5771562; doi:10.1371/journal.pone.0190418), 2018-01-17
Supplement: pone.0190418.s002.pdf [file pone.0190418.s002.pdf]

**S1 Table. Genetic diversity of R1 region found in 163 3D7-liked *msp2* sequences.**

| Code | Dipeptide | Allele | R1 sequence                                       | R1 type |
|------|-----------|--------|---------------------------------------------------|---------|
| 1    | GA        | 1      | <u>1162111621165</u>                              | 162     |
| 2    | GS        | 2      | 116211162111621165                                | 162     |
| 3    | GG        | 3      | 1162116211621111162115                            | 162     |
| 4    | GD        | 4      | 16211162111621111162111621165                     | 162     |
| 5    | SA        | 5      | 116211621162111111621116621165                    | 162     |
| 6    | VA        | 6      | 162111621116211111621111621165                    | 162     |
| 7    | RD        | 7      | 116211621621116211116211162115                    | 162     |
| 8    | SG        | 8      | 1162116211621111621116211162115                   | 162     |
| 9    | GT        | 9      | 11621162116211116211116211162115                  | 162     |
| 0    | PT        | 10     | 116211621162111116211116211162115                 | 162     |
|      |           | 11     | <u>1851185118521</u>                              | 185     |
|      |           | 12     | 1851185118518521                                  | 185     |
|      |           | 13     | 1851185118518518518518518518521                   | 185     |
|      |           | 14     | 1851185118518518518518518518518521                | 185     |
|      |           | 15     | 1851118518518518518518518518518521                | 185     |
|      |           | 16     | 18511118511851185118518511858518521               | 185     |
|      |           | 17     | 1851185118518518518518518518518521                | 185     |
|      |           | 18     | 185118511858511851185118511851185118521           | 185     |
|      |           | 19     | 185118513518511851185118511851185118521           | 185     |
|      |           | 20     | 18511851185185111851185118511851185118521         | 185     |
|      |           | 21     | 18511851185118511851185118511851185118521         | 185     |
|      |           | 22     | 18511851185118511851118511851185118511852         | 185     |
|      |           | 23     | <u>185118511851185118511185118511851185118511</u> | 185     |
|      |           | 24     | <u>011185241858518585185851</u>                   | 18585   |
|      |           | 25     | 011118524185851858518585185851                    | 18585   |
|      |           | 26     | 01111852418585185851858518585185851               | 18585   |
|      |           | 27     | 001111852418585185851858518585185851              | 18585   |
|      |           | 28     | 011111852418585185851858518585185851              | 18585   |
|      |           | 29     | 18511185851858518585185851851118521               | 18585   |
|      |           | 30     | <u>91852118524165</u>                             | 1852    |
|      |           | 31     | 9185211852118524165                               | 1852    |
|      |           | 32     | <u>18521652165</u>                                | 2165    |
|      |           | 33     | 165216521652165                                   | 2165    |
|      |           | 34     | 185216521652165                                   | 2165    |
|      |           | 35     | 185216521652165216521652165                       | 2165    |
|      |           | 36     | 18521652165216521652165216521652165               | 2165    |
|      |           | 37     | 18521652165216521652165216521652165               | 2165    |
|      |           | 38     | <u>1118527165271652716527165</u>                  | 27165   |
|      |           | 39     | 11185271652716527165271652716527165               | 27165   |
|      |           | 40     | 1118527165271652716527165271652716527165          | 27165   |
|      |           | 41     | 1118527165271652716527165271652716527165          | 27165   |
|      |           | 42     | <u>138538538524</u>                               | 385     |
|      |           | 43     | 138538538538538538524                             | 385     |
|      |           | 44     | 138538538538538538521                             | 385     |
|      |           | 45     | 138538538538538538524                             | 385     |
|      |           | 46     | 138538538538538538538538524                       | 385     |
|      |           | 47     | 1385385385385385385385385                         | 385     |
|      |           | 48     | 138538538538538538538538538524                    | 385     |
|      |           | 49     | 138538538538538538538538538538538538524           | 385     |
|      |           | 50     | 138513851385138513851385138513851851185118521     | 385     |
|      |           | 51     | <u>18535353535353535353535353535353535353524</u>  | 35      |
|      |           | 52     | 135353535353535353535353535353535353524           | 35      |
|      |           | 53     | 18535353535353535353535353535353535353524         | 35      |
|      |           | 54     | <u>1385385385385</u> 35353524                     | 385-35  |
